# Supplementary material
Source: MDPI journal article supplement (https://www.mdpi.com/2073-4344/13/2/441)
Supplement: s1 [file s1 › catalysts-2229038-supplementary.pdf]

**Supplementary Materials:**

**Role of N-terminal Extensional Long  $\alpha$ -Helix in the Arylesterase  
from *Lactocaseibacillus rhamnosus* GG on Catalysis and Stability**

**Table S1.** PCR primers used for cloning of the arylesterase LggEst wild type and deleted mutant into the plasmid pET-28a.

| Primer name                    | Primer sequence (5' → 3')                            |
|--------------------------------|------------------------------------------------------|
| LggEst-wild type-F             | AACTTTAAGAAGGAGATATACCATGGCAGATGAAGAGGCAATGTTGGCAA   |
| LggEst-wild type-R             | GGATCTCAGTGGTGGTGGTGGTGGTGGTTCAAATTCGTTTTCTTCAGCTTGA |
| pET28a-LggEst-wild type-F      | TCAAGCTGAAGAAAACGAATTTGAACACCACCACCACCACCACTGAGATCC  |
| pET28a-LggEst-wild type-R      | TTGCCAACATTGCCTCTTCATCTGCCATGGTATATCTCCTTCTTAAAGTT   |
| LggEst-deleted mutant-F        | AACTTTAAGAAGGAGATATACCATGCGGGTACCGGAAGATGTTCAATTGGG  |
| LggEst-deleted mutant-R        | GGATCTCAGTGGTGGTGGTGGTGGTGGTTCAAATTCGTTTTCTTCAGCTTGA |
| pET28a-LggEst-deleted mutant-F | TCAAGCTGAAGAAAACGAATTTGAACACCACCACCACCACCACTGAGATCC  |
| pET28a-LggEst-deleted mutant-R | CCCAATGAACATCTTCCGGTACCCGCATGGTATATCTCCTTCTTAAAGTT   |

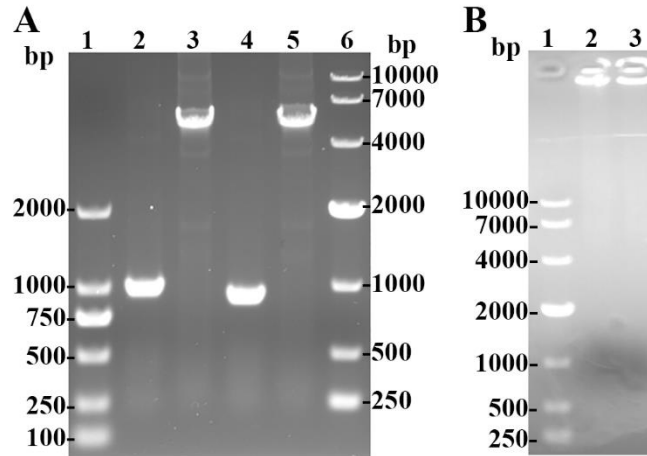

**Figure S1.** Gene cloning of the arylesterase LggEst wild type and deleted mutant. (A) Agarose gel for PCR products of the genes LggEst wild type and deleted mutant, and the plasmid pET-28a. Lane 1, DNA ladder; Lane 2, PCR product of the gene LggEst wild type; Lane 3, PCR product of the plasmid pET-28a for cloning of the gene LggEst wild type; Lane 4, PCR product of the gene LggEst deleted mutant; Lane 5, PCR product of the plasmid pET-28a for cloning of the gene LggEst deleted mutant; Lane 6, DNA ladder. (B) Agarose gel for POE-PCR products of cloning of LggEst wild type and deleted mutant into pET-28a. Lane 1, DNA ladder; Lane 2, POE-PCR product of cloning of LggEst wild type; Lane 2, POE-PCR product of cloning of LggEst deleted mutant.

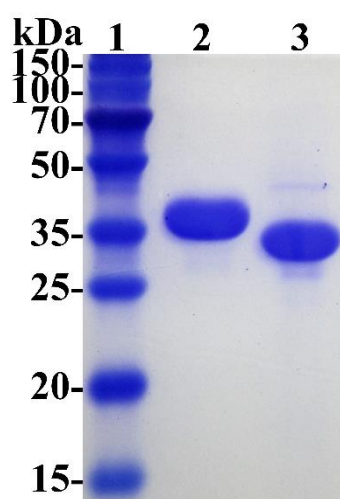

**Figure S2.** SDS-PAGE (15%) for purification of recombinant LggEst wild type and the deleted mutant in *E. coli*. Lane 1, protein marker; lane 2, the purified LggEst wild type; lane 3, the purified LggEst deleted mutant. Molecular mass of recombinant LggEst wild type and deleted mutant containing the C-terminal (His)<sub>6</sub> tag is 36.6 kDa, and 33.5 kDa, respectively.

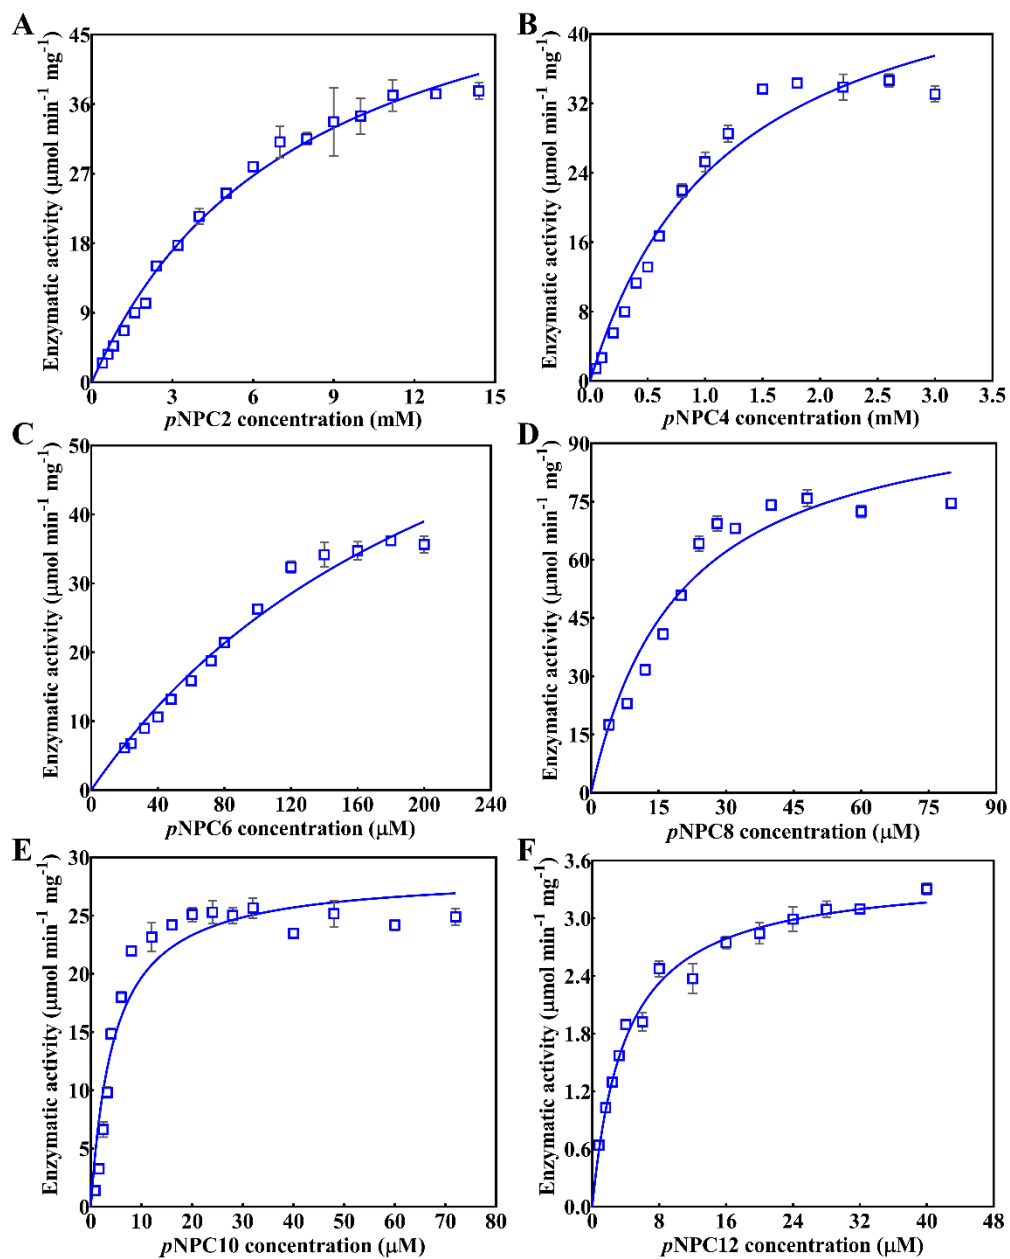

**Figure S3.** Michaelis-Menten kinetic plots for arylesterase LggEst wild type on the hydrolysis of the *p*-nitrophenyl esters.

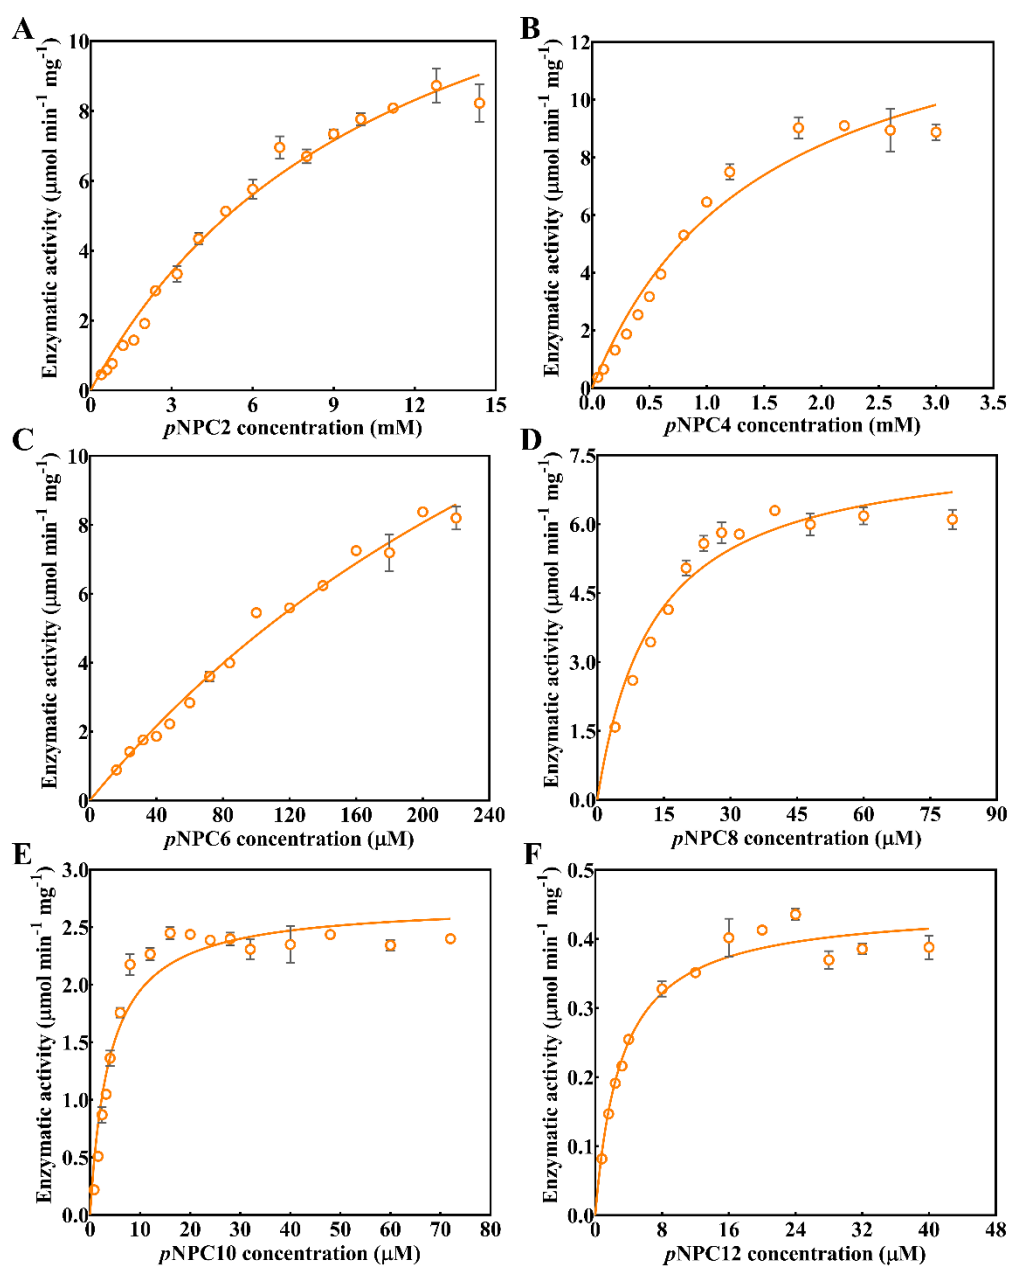

**Figure S4.** Michaelis-Menten kinetic plots for arylesterase LggEst deleted mutant on the hydrolysis of the *p*-nitrophenyl esters.
